# Supplementary material
Source: MDPI journal article supplement (https://www.mdpi.com/2673-4389/4/1/5)

Supplementary

Table S1- Inclusion and exclusion criteria for all studies included.

|                   | Inclusion Criteria                                                                                                                                                                                                                                                                                                                                                                      | Exclusion Criteria                                                                                                                                                                                                                                                                                                                                                                                                                                                                                                                                                                                                                          |
|-------------------|-----------------------------------------------------------------------------------------------------------------------------------------------------------------------------------------------------------------------------------------------------------------------------------------------------------------------------------------------------------------------------------------|---------------------------------------------------------------------------------------------------------------------------------------------------------------------------------------------------------------------------------------------------------------------------------------------------------------------------------------------------------------------------------------------------------------------------------------------------------------------------------------------------------------------------------------------------------------------------------------------------------------------------------------------|
| Study 1<br>(n=9)  | <ul style="list-style-type: none"> <li>• Age 18–40 years</li> <li>• BMI <math>\geq 18.5</math> and <math>&lt; 30 \text{ kg.m}^{-2}</math></li> <li>• Weight not fluctuated more than <math>\pm 3\text{kg}</math> in the last 6 months,</li> <li>• Recreationally active, but not elite</li> </ul>                                                                                       | <ul style="list-style-type: none"> <li>• contraindication to exercise (e.g., ongoing, musculoskeletal injury, first-degree relative experienced severe cardiac event at early age [<math>&lt; \sim 45</math> years], breathlessness or dizziness on exertion, poor circulation, hypo- or hypertension),</li> <li>• excessive purposeful exercise (<math>&gt; 5</math> times <math>\times</math> 20-minute bouts of self-reported vigorous exercise performed per week,</li> <li>• weight instability (<math>&gt; 3\text{kg}</math> change in previous 6 months)</li> <li>• Use of any medications known to affect study outcomes</li> </ul> |
| Study 2<br>(n=11) | <ul style="list-style-type: none"> <li>• Age 50–74 years,</li> <li>• BMI <math>\geq 27.5 \text{ kg.m}^{-2}</math> (White European) or <math>\geq 25 \text{ kg.m}^{-2}</math> (South Asian) <b>OR</b></li> <li>• Has had 2-hour glucose between <math>7.8 \text{ mmol.L}^{-1}</math> and <math>11.1 \text{ mmol.L}^{-1}</math> after an oral glucose tolerance test <b>OR</b></li> </ul> | <ul style="list-style-type: none"> <li>• Regular purposeful exercise (<math>\geq 3 \times 20</math>-minute bouts of self-reported vigorous exercise performed per week</li> <li>• Use of any glucose lowering medication,</li> <li>• contraindication to exercise (e.g., abnormal resting ECG, breathlessness or dizziness on exertion, poor circulation, hypo- or hypertension),</li> </ul>                                                                                                                                                                                                                                                |

|                   |                                                                                                                                                                                                                                                                                                                                                                                                                                                                                                                                                                                                                                                                                                                                 |                                                                                                                                                                                                                                                                                                                                                                                                                                                                                                                                                                                                                                                                                                                                                                                                     |
|-------------------|---------------------------------------------------------------------------------------------------------------------------------------------------------------------------------------------------------------------------------------------------------------------------------------------------------------------------------------------------------------------------------------------------------------------------------------------------------------------------------------------------------------------------------------------------------------------------------------------------------------------------------------------------------------------------------------------------------------------------------|-----------------------------------------------------------------------------------------------------------------------------------------------------------------------------------------------------------------------------------------------------------------------------------------------------------------------------------------------------------------------------------------------------------------------------------------------------------------------------------------------------------------------------------------------------------------------------------------------------------------------------------------------------------------------------------------------------------------------------------------------------------------------------------------------------|
|                   | <ul style="list-style-type: none"> <li>• Has HbA1c between 5.70%–6.49% at baseline or at their most recent blood test within the previous 5 years,</li> <li>• Weight not fluctuated more than <math>\pm 5</math>kg in the last 6 months</li> </ul>                                                                                                                                                                                                                                                                                                                                                                                                                                                                              | <ul style="list-style-type: none"> <li>• Significant renal or hepatic impairment defining parameters i.e., chronic kidney disease stage 3b, liver markers more than 3x greater than the normal range</li> </ul>                                                                                                                                                                                                                                                                                                                                                                                                                                                                                                                                                                                     |
| Study 3<br>(n=23) | <ul style="list-style-type: none"> <li>• Age 30–75 years,</li> <li>• <math>\geq 27.0 \text{ kg.m}^{-2}</math> and <math>\leq 45.0 \text{ kg.m}^{-2}</math> or <math>\geq 23.0 \text{ kg.m}^{-2}</math> and <math>\leq 45.0 \text{ kg.m}^{-2}</math> (South Asian),</li> <li>• Waist circumference <math>\geq 94</math> cm (or <math>\geq 90</math> cm if south Asian),</li> <li>• HbA1c <math>\geq 6.5\%</math> and <math>&lt;10\%</math>,</li> <li>• Clinically elevated liver fat (<math>\geq 5.56\%</math> assessed via <math>^1\text{H}</math>-MRS),</li> <li>• Additional criteria for participants with T2DM: HbA1c <math>&lt; 6\%</math>, treatment via lifestyle or metformin only within the last 6 months,</li> </ul> | <ul style="list-style-type: none"> <li>• Contraindication to magnetic resonance procedures,</li> <li>• Contraindication to exercise,</li> <li>• Participating in regular purposeful exercise training of vigorous intensity – frequency <math>\geq 3</math> sessions per week and intensity <math>\geq 6.0</math> metabolic equivalents,</li> <li>• Weight instability or planned/on-going dietary intervention,</li> <li>• Current smoker,</li> <li>• Uncontrolled hypertension- systolic blood pressure <math>\geq 160</math>mmHg and/or diastolic blood pressure <math>\geq 100</math> mmHg,</li> <li>• Additional criteria for participants with T2DM: taking additional oral anti-diabetic medication to metformin (e.g., SGLT2i, GLP-1RA) within the last 6 months, taking insulin</li> </ul> |

**Note:** BMI, body mass index; ECG, electrocardiogram; HbA1c, glycosylated haemoglobin;  $^1\text{H}$ -MRS, proton magnetic resonance spectroscopy; T2DM, type 2 diabetes

Study 1- All participants took part in Study 1 were included in Part A; Study 2- 48% of the participants (11/23 participants) within Study 2 were included in Part A, chosen to match the characteristics of Study 1; Study 3- 58% of all participants (23/40 participants) within Study 3 were included in Part A, chosen due to HbA1c  $> 6.5\%$ .

**Supplementary Figure S1- A schematic of the experimental trials**

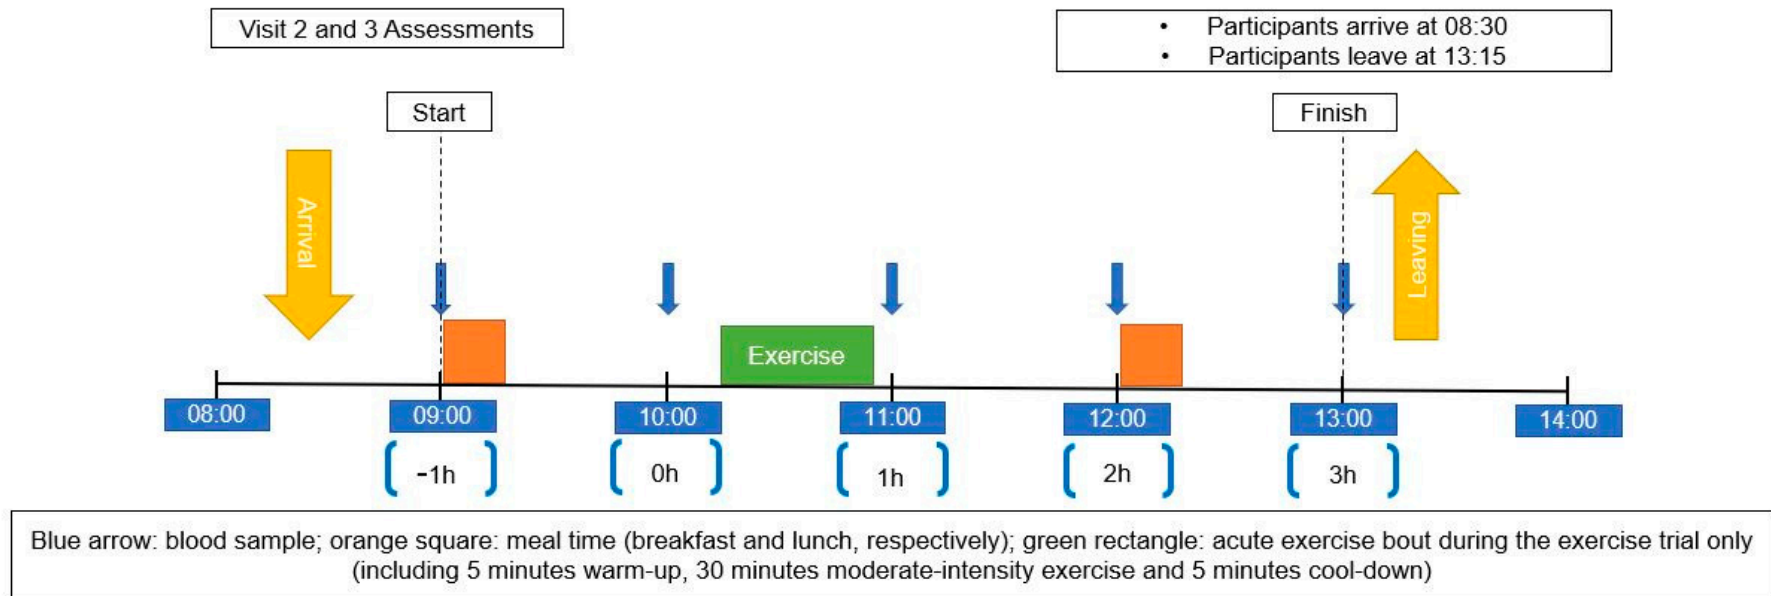

Supplement: s1 [file s1]
